# Supplementary material
Source: MDPI journal article supplement (https://www.mdpi.com/2073-4395/13/12/2918)
Supplement: s1 [file s1]

**Table S1.** Primers sequence and usage.

| Primer name          | Primer sequence (5'-3')                              | Primer usage                 |
|----------------------|------------------------------------------------------|------------------------------|
| <i>AmbHLH148-F</i>   | ATGCAGATGGACTCCTACTACTTCCAC                          | full-length<br>amplification |
| <i>AmbHLH148-R</i>   | TCATTTCATTTCAGCACATGGCATTCCG                         |                              |
| <i>U6-F</i>          | GGACATCCGATAAAATTGGAACGATACAG                        | qRT-PCR                      |
| <i>U6-R</i>          | AATTTGGACCATTCTCTCGATTATGCGTGT                       |                              |
| <i>AmbHLH148-q-F</i> | CTCCCGCTCCAAGGTACTACTCC                              |                              |
| <i>AmbHLH148-q-R</i> | TCATTTCATTTCAGCACATGGCATTCCG                         |                              |
| <i>L25-F</i>         | AAGGCACAGGCAGCTAAGGTTG                               |                              |
| <i>L25-R</i>         | ACGAGGGTACTTGGGGTTTCTATCC                            |                              |
| <i>NtNAC2-F</i>      | CCACATTTCCCTACTTCCTACCTC                             |                              |
| <i>NtNAC2-R</i>      | CCCTGACCATCCACCACATT                                 |                              |
| <i>NtHSP70-8-F</i>   | CAGCAGGAGGTGTTTCGCAGATC                              |                              |
| <i>NtHSP70-8-R</i>   | TGTTTGGAAGAGGTGACGCATCAG                             |                              |
| <i>AmbHLH148-T-F</i> | <b>CCATTTACGAACGATACTCGAGATGCAGATGGACTCCTACTACTT</b> | Gene cloning                 |
| <i>AmbHLH148-T-R</i> | <b>GCTCACCATCACTAGTACGTCGACTTCATTTCAGCACATGGCATT</b> |                              |
| <i>AmbHLH148-P-F</i> | ACCTCCTCGGATTCCATTGC                                 | Positive plant<br>detection  |
| <i>AmbHLH148-P-R</i> | TGCTCCTCCTCCTCACAAC                                  |                              |

|   | Description                                                                                                        | Scientific Name             | Max Score | Total Score | Query Cover | E value | Per. Ident | Acc. Len | Accession                      |
|---|--------------------------------------------------------------------------------------------------------------------|-----------------------------|-----------|-------------|-------------|---------|------------|----------|--------------------------------|
| ✓ | PREDICTED: <i>Aegilops tauschii</i> subsp. <i>strangulata</i> transcription factor BHLH148 (LOC109765401).trans... | <i>Aegilops tauschii</i>    | 660       | 660         | 99%         | 0.0     | 90.02%     | 10983    | <a href="#">XM_020324184.3</a> |
| ✓ | PREDICTED: <i>Triticum aestivum</i> transcription factor BHLH148-like (LOC123104964).transcript variant X1...      | <i>Triticum aestivum</i>    | 593       | 593         | 99%         | 1e-164  | 88.30%     | 4388     | <a href="#">XM_044526920.1</a> |
| ✓ | PREDICTED: <i>Triticum dicoccoides</i> transcription factor BHLH148-like (LOC119303083).transcript variant...      | <i>Triticum dicoccoides</i> | 593       | 593         | 99%         | 1e-164  | 88.30%     | 9956     | <a href="#">XM_037580173.1</a> |
| ✓ | PREDICTED: <i>Aegilops tauschii</i> subsp. <i>strangulata</i> transcription factor BHLH148 (LOC109765401).trans... | <i>Aegilops tauschii</i>    | 579       | 579         | 84%         | 3e-160  | 90.62%     | 10886    | <a href="#">XM_020324188.3</a> |
| ✓ | PREDICTED: <i>Aegilops tauschii</i> subsp. <i>strangulata</i> transcription factor BHLH148 (LOC109765401).trans... | <i>Aegilops tauschii</i>    | 577       | 577         | 84%         | 1e-159  | 90.60%     | 10888    | <a href="#">XM_020324186.3</a> |

**Figure S1.** Homology analysis of the *AmbHLH148*.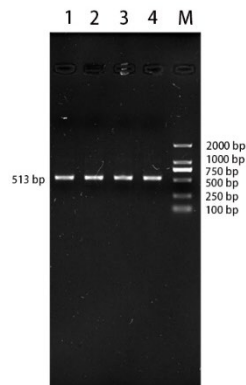**Figure S2.** The electrophoresis detection of *AmbHLH148* PCR amplification.

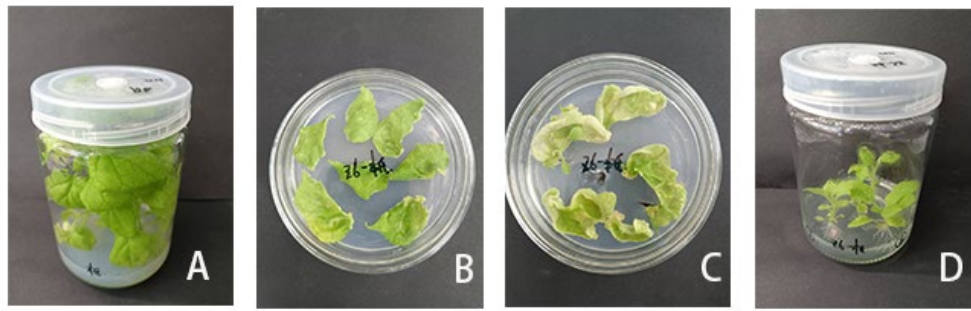

**Figure S3.** The flow of genetic transformation of *AmbHLH148* transgenic tobacco.

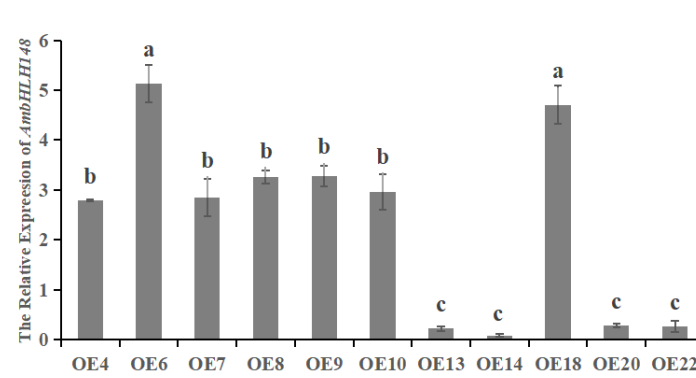

**Figure S4.** Relative expression levels of the *AmbHLH148* gene in transgenic plants.
